# Supplementary material for: Adalimumab Therapy Improves Intestinal Dysbiosis in Crohn’s Disease
Source: PubMed Central journal article supplement (PMC6832711; doi:10.3390/jcm8101646), 2019-10-09
Supplement: jcm-08-01646-s001.pdf [file jcm-08-01646-s001.pdf]

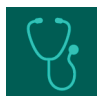

**Table S1.** Relationship between bacterial populations of phyla and disease localization.

|                       | Colon/ileum-colon (%) | Ileum only (%) | <i>p</i> value |
|-----------------------|-----------------------|----------------|----------------|
| <b>Phyla</b>          |                       |                |                |
| <i>Firmicutes</i>     | 50.6 ± 6.5            | 37.7 ± 8.0     | 0.224          |
| <i>Bacteroidetes</i>  | 32.1 ± 6.6            | 35.6 ± 6.7     | 0.720          |
| <i>Actinobacteria</i> | 3.9 ± 1.0             | 0.7 ± 0.5      | 0.024          |
| <i>Proteobacteria</i> | 13.0 ± 5.4            | 19.8 ± 3.2     | 0.362          |

**Table S2.** Changes in phyla according to disease localization.

| Phyla                 | Colon/ileum-colon |            |                | Ileum only |            |                |
|-----------------------|-------------------|------------|----------------|------------|------------|----------------|
|                       | T0 (%)            | T1 (%)     | <i>p</i> value | T0 (%)     | T1 (%)     | <i>p</i> value |
| <i>Firmicutes</i>     | 50.6 ± 6.5        | 49.8 ± 3.5 | 0.478          | 37.7 ± 8.0 | 47.6 ± 5.8 | 0.184          |
| <i>Bacteroidetes</i>  | 32.1 ± 6.6        | 38.4 ± 3.6 | 0.566          | 35.6 ± 6.7 | 35.2 ± 8.7 | 0.914          |
| <i>Actinobacteria</i> | 3.9 ± 1.0         | 4.1 ± 1.1  | 0.848          | 0.7 ± 0.5  | 1.4 ± 0.6  | 0.210          |
| <i>Proteobacteria</i> | 13.0 ± 5.4        | 7.4 ± 3.3  | 0.227          | 19.8 ± 3.2 | 14.7 ± 6.9 | 0.534          |

**Table S3.** Relationship between bacterial populations of phyla and disease severity.

|                       | Mild/moderate (%) | Severe (%)  | <i>p</i> value |
|-----------------------|-------------------|-------------|----------------|
| <b>Phyla</b>          |                   |             |                |
| <i>Firmicutes</i>     | 41.0 ± 5.4        | 55.9 ± 11.1 | 0.187          |
| <i>Bacteroidetes</i>  | 41.4 ± 4.5        | 15.0 ± 7.5  | 0.006          |
| <i>Actinobacteria</i> | 2.3 ± 0.8         | 3.2 ± 1.6   | 0.571          |
| <i>Proteobacteria</i> | 11.7 ± 3.0        | 25.2 ± 8.6  | 0.076          |

**Table S4.** Changes in phyla according to disease severity.

| Phyla                 | Mild/moderate |            |                | Severe      |            |                |
|-----------------------|---------------|------------|----------------|-------------|------------|----------------|
|                       | T0 (%)        | T1 (%)     | <i>p</i> value | T0 (%)      | T1 (%)     | <i>p</i> value |
| <i>Firmicutes</i>     | 41.0 ± 5.4    | 47.7 ± 3.5 | 0.233          | 55.9 ± 11.1 | 51.9 ± 6.9 | 0.772          |
| <i>Bacteroidetes</i>  | 31.4 ± 4.5    | 40.2 ± 4.6 | 0.754          | 15.0 ± 7.5  | 30.1 ± 7.6 | 0.199          |
| <i>Actinobacteria</i> | 2.3 ± 0.8     | 3.1 ± 0.9  | 0.393          | 3.2 ± 1.6   | 2.8 ± 1.4  | 0.697          |
| <i>Proteobacteria</i> | 11.7 ± 3.0    | 8.4 ± 3.9  | 0.467          | 25.2 ± 8.6  | 14.6 ± 6.8 | 0.287          |
